# Supplementary material for: Genetic determinants of antithyroid drug-induced agranulocytosis by human leukocyte antigen genotyping and genome-wide association study
Source: PubMed Central journal article supplement (PMC4506516; doi:10.1038/ncomms8633), 2015-07-07
Supplement: ncomms8633-s1.pdf [file ncomms8633-s1.pdf]

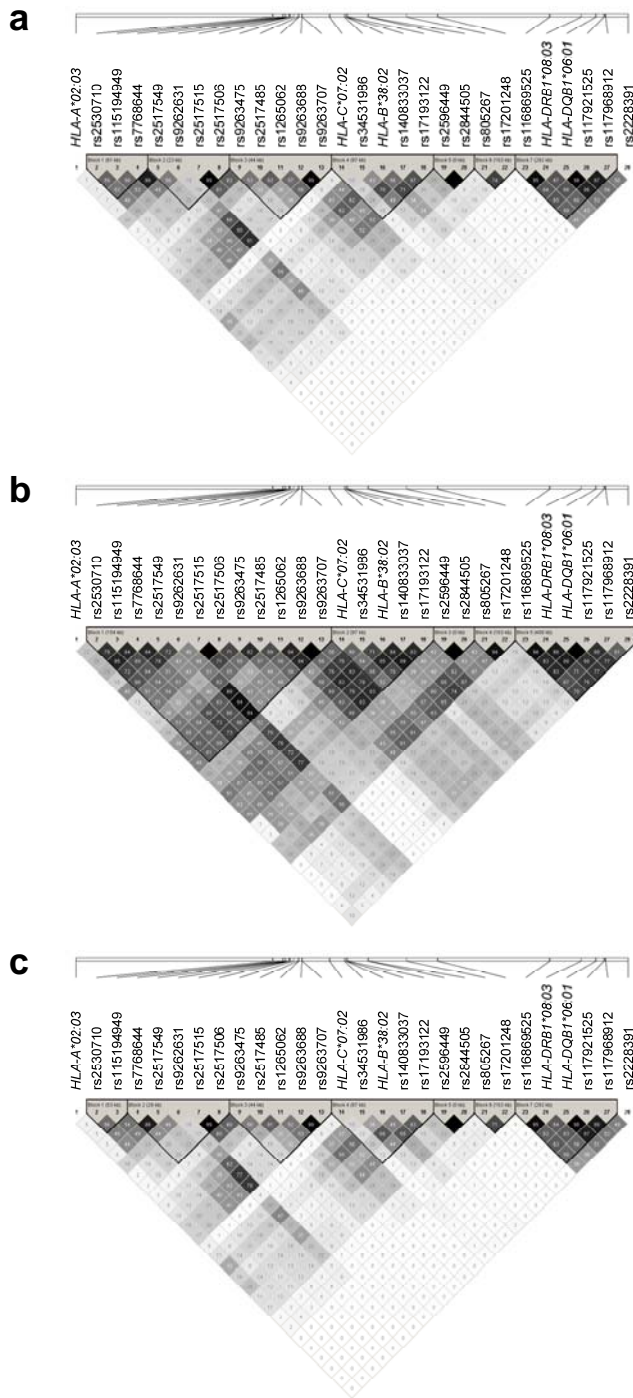

**Supplementary Figure 1** The linkage disequilibrium plots of 5 selected HLA genes/alleles and 23 SNPs at the HLA regions. (a) in all combined 42 TiA cases and 1,208 GD controls, (b) in 42 TiA cases, and (c) in 1,208 GD controls. The numbers inside individual cells are the  $r^2$  values ( $\times 100\%$ ) of corresponding allele pairs.

Quantile-Quantile plot

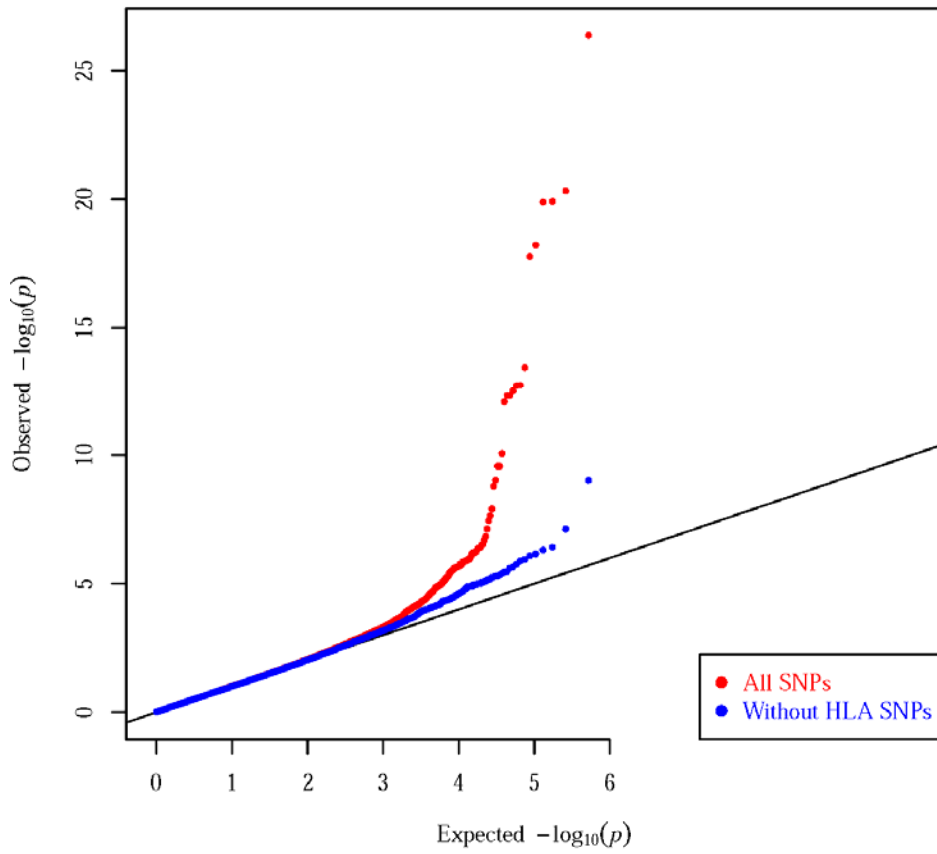

Supplementary Figure 2 Quantile-quantile plot (Q-Q plot) for test statistic in 42 TiA cases compared with 927 GD controls.

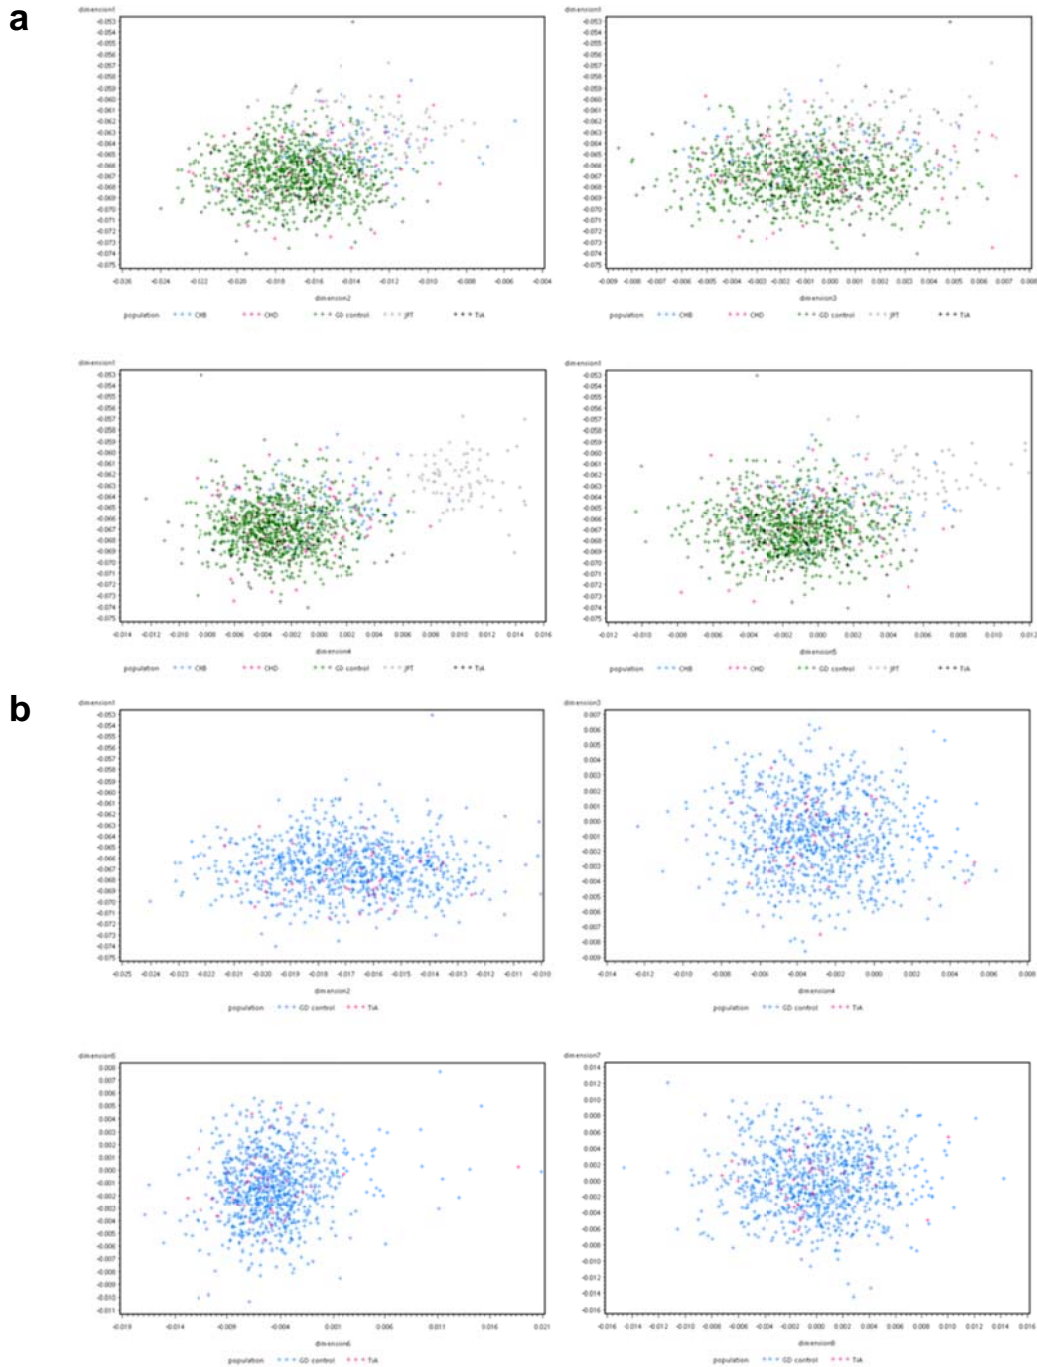

**Supplementary Figure 3 The multidimensional scaling (MDS) plot. (a)** The MDS plot of 969 GWAS samples (denoted as “TiA” for the 42 TiA cases and “GD control” for 927 GD controls) and 281 ASN reference DNA samples (CHB+CHD+JPT) from HapMap. **(b)** Plots of the first eight dimensions from the MDS analysis using 969 samples (42 TiA and 927 GD controls).

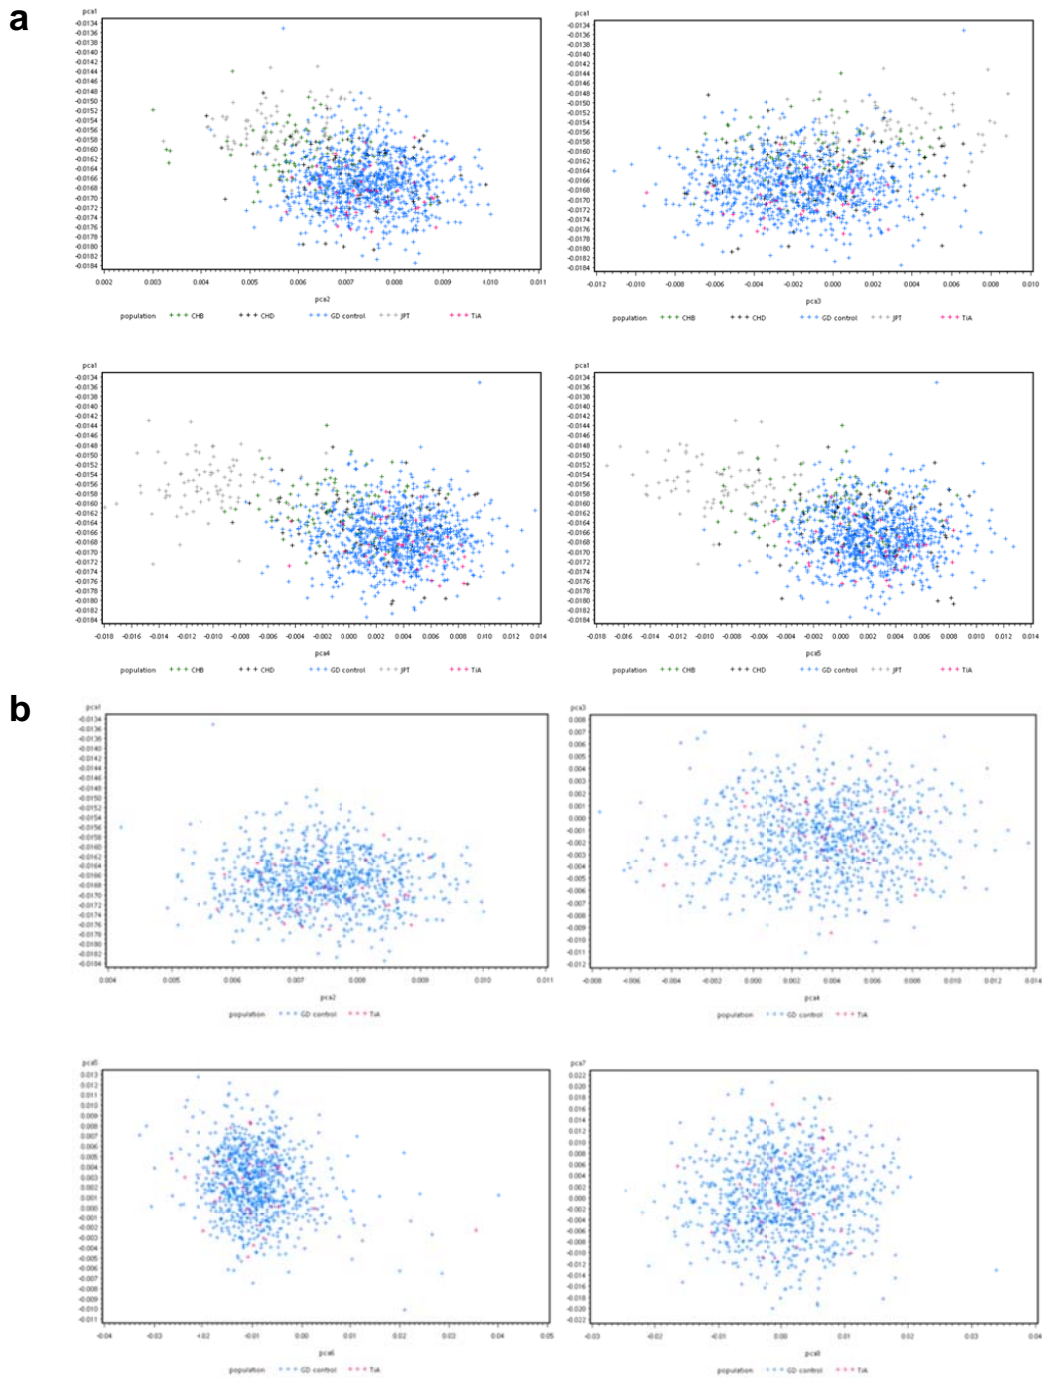

**Supplementary Figure 4 The principal-component analysis (PCA).** (a) PCA of 969 samples and 281 ASN reference DNA samples (CHB+CHD+JPT) from HapMap. (b) Plots of first eight principal-components from the PCA using 969 samples (42 T1A cases and 927 GD controls).

```

AA Position      -21      -11      -1       10       20       30       40       50       60       70
B*38:02:01      MLVM  APRTVLLLLS  AALALTETWA  GSHSMRYFYT  SVSRPGRGEP  RFISVGYVDD  TQFVRFDSDA  ASPREEPRAP  WIEQEGPEYW  DRNTQICKTN
B*38:01:01      -----
B*38:15         *****
AA Position      80       90       100      110      120      130      140      150      160      170
B*38:02:01      TQTYRENLR  ALRYYNQSEA  GSHTLQRMYG  CDVGPDRLL  RGHNQFAYDG  KDYIALNEDL  SSWTAADTAA  QITQRKWEAA  RVAEQLR  TYL  EGTCVEWLR
B*38:01:01      -----I-----
B*38:15         -----P-----
AA Position      180      190      200      210      220      230      240      250      260      270
B*38:02:01      YLENGKETLQ  RADPPKTHVT  HHPISDHEAT  LRCWALGFYP  AEITLTWQRD  GEDQTQDTEL  VETRPAGDRT  FQKWAAVVVP  SGEEQRYTCH  VQHEGLPKPL
B*38:01:01      -----
B*38:15         -----
AA Position      280      290      300      310      320      330
B*38:02:01      TLRWEPSSQS  TVPIVGIVAG  LAVL.AVVVIG  AVVAAVMCR  R  KSSGGKGGSY  SQAASSDSAQ  GSDVSLTA
B*38:01:01      -----
B*38:15         *****

```

**Supplementary Figure 5 Amino acid sequence alignment of *HLA-B\*38:02*, *HLA-B\*38:01* and *HLA-B\*38:15*.**

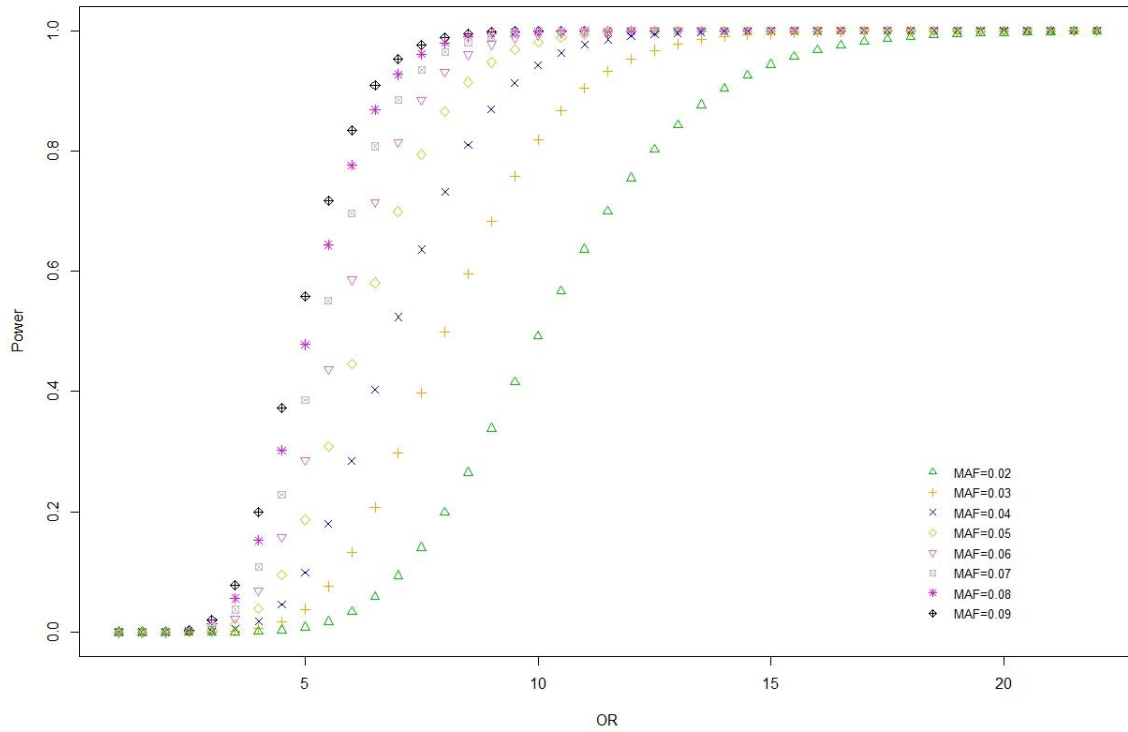

**Supplementary Figure 6 Power calculation.** The statistic power was calculated with sample size of the current GWAS study (TiA case number = 42, GD control number = 927) under various minor allele frequencies (MAFs) and odds ratios (ORs) settings using QUANTO<sup>1</sup>. A cut-off  $P$  value of  $1 \times 10^{-8}$  was used for the calculation.

**Supplementary Table 1 Study design and number of genotyped participants**

| <b>Study Group</b> | <b>Sample Group</b>                           | <b>N</b> | <b>Genotyping</b>                                      | <b>Enrolled time</b> |
|--------------------|-----------------------------------------------|----------|--------------------------------------------------------|----------------------|
| First-stage        | TiA cases                                     | 21       | Axiom CHB GWAS SNP genotyping<br>Direct HLA genotyping | 2001-2012            |
|                    | GD controls<br>(Unrelated Singletons)         | 497      | Axiom CHB GWAS SNP genotyping<br>Direct HLA genotyping | 2001-2006            |
|                    | GD controls<br>(Unrelated Family<br>Probands) | 165      | Direct HLA genotyping                                  | 2001-2006            |
| Second-stage       | TiA cases                                     | 21       | Axiom CHB GWAS SNP genotyping<br>Direct HLA genotyping | 2013-2014            |
|                    | GD controls<br>(Unrelated Singletons)         | 546      | Axiom CHB GWAS SNP genotyping<br>Direct HLA genotyping | 2001-2011            |

**Supplementary Table 2 Genotypic information of 42 TiA cases**

| <b>Study group</b> | <b>Study subject</b> | <b>Genotype of <i>HLA-B</i></b> | <b>Genotype of rs17193122</b> | <b>Genotype of rs116869525</b> | <b>Genotype of <i>HLA-DRB1</i></b> |
|--------------------|----------------------|---------------------------------|-------------------------------|--------------------------------|------------------------------------|
| First-stage        | Stage1_01            | 48:01/55:02                     | GG                            | CC                             | 04:05/15:01                        |
|                    | Stage1_02            | 27:04/46:01                     | GG                            | CC                             | 04:05/09:01                        |
|                    | Stage1_03            | 38:02/46:01                     | AG                            | TC                             | 08:03/09:01                        |
|                    | Stage1_04            | 38:02/46:01                     | AG                            | TT                             | 08:03/08:03                        |
|                    | Stage1_05            | 38:02/46:01                     | AG                            | CC                             | 09:01/09:01                        |
|                    | Stage1_06            | 15:02/39:01                     | GG                            | TC                             | 08:03/16:02                        |
|                    | Stage1_07            | 38:02/40:01                     | AG                            | TC                             | 08:03/16:02                        |
|                    | Stage1_08            | 46:01/48:03                     | GG                            | CC                             | 09:01/12:02                        |
|                    | Stage1_09            | 38:02/46:01                     | AG                            | CC                             | 04:03/04:06                        |
|                    | Stage1_10            | 35:01/38:02                     | AG                            | CC                             | 15:01/15:02                        |
|                    | Stage1_11            | 15:11/38:02                     | AG                            | TC                             | 08:03/15:01                        |
|                    | Stage1_12            | 40:01/54:01                     | GG                            | CC                             | 11:01/14:05                        |
|                    | Stage1_13            | 46:01/58:01                     | GG                            | CC                             | 03:01/04:05                        |
|                    | Stage1_14            | 46:01/52:01                     | GG                            | CC                             | 07:01/15:01                        |
|                    | Stage1_15            | 13:02/51:02                     | GG                            | CC                             | 04:05/07:01                        |
|                    | Stage1_16            | 38:02/51:01                     | AG                            | TC                             | 08:03/09:01                        |
|                    | Stage1_17            | 38:15/40:01                     | AG                            | TT                             | 08:03/08:03                        |
|                    | Stage1_18            | 35:03/38:02                     | AG                            | CC                             | 08:03/16:02                        |
|                    | Stage1_19            | 40:01/58:01                     | GG                            | CC                             | 09:01/09:01                        |
|                    | Stage1_20            | 15:01/15:01                     | GG                            | TC                             | 08:03/09:01                        |
|                    | Stage1_21            | 27:04/38:02                     | AG                            | TC                             | 04:06/08:03                        |
|                    | Stage2_01            | 37:01/38:02                     | AG                            | TC                             | 08:03/10:01                        |
|                    | Stage2_02            | 38:02/40:02                     | AG                            | CC                             | 15:01/16:02                        |
|                    | Stage2_03            | 40:06/51:01                     | GG                            | CC                             | 09:01/12:01                        |
|                    | Stage2_04            | 40:01/46:01                     | GG                            | TC                             | 08:03/08:09                        |
|                    | Stage2_05            | 38:02/40:01                     | AG                            | CC                             | 12:01/16:02                        |
|                    | Stage2_06            | 38:02/51:01                     | AG                            | TC                             | 08:03/16:02                        |
|                    | Stage2_07            | 38:02/46:01                     | AG                            | CC                             | 09:01/16:02                        |



|              |           |             |    |    |             |
|--------------|-----------|-------------|----|----|-------------|
| Second-stage | Stage2_08 | 13:01/38:02 | AG | CC | 15:01/15:02 |
|              | Stage2_09 | 38:02/40:01 | AG | CC | 11:01/11:01 |
|              | Stage2_10 | 38:02/46:01 | AG | TC | 08:03/12:01 |
|              | Stage2_11 | 38:02/46:01 | AG | TC | 08:03/09:01 |
|              | Stage2_12 | 38:02/40:01 | AG | TC | 04:03/08:03 |
|              | Stage2_13 | 39:01/54:01 | GG | TC | 08:03/09:01 |
|              | Stage2_14 | 38:02/51:02 | AG | TC | 08:03/16:02 |
|              | Stage2_15 | 35:05/46:01 | GG | CC | 04:05/12:02 |
|              | Stage2_16 | 58:01/58:01 | GG | CC | 03:01/03:01 |
|              | Stage2_17 | 13:01/54:01 | AG | TC | 08:03/15:01 |
|              | Stage2_18 | 38:02/40:01 | AG | TC | 08:03/09:01 |
|              | Stage2_19 | 38:02/46:01 | AG | CC | 04:06/09:01 |
|              | Stage2_20 | 38:02/51:01 | AG | TC | 04:06/08:03 |
|              | Stage2_21 | 38:02/51:02 | AG | TC | 08:03/15:02 |

**Supplementary Table 3 Results of association analysis using direct HLA typing and SNP imputation**

| HLA                   | Position | Direct HLA typing |         |                    |                        | Imputed HLA using SNP2HLA <sup>a</sup> |         |                    |                        |
|-----------------------|----------|-------------------|---------|--------------------|------------------------|----------------------------------------|---------|--------------------|------------------------|
|                       |          | GD control MAF    | TiA MAF | OR (95% CI)        | $P_{additive}$         | GD control MAF                         | TiA MAF | OR (95% CI)        | $P_{additive}$         |
| <i>HLA-B*38:02</i>    | 31323319 | 0.0333            | 0.2976  | 14.89 (7.98-27.78) | $8.35 \times 10^{-17}$ | 0.0432                                 | 0.3095  | 12.57 (6.73-23.46) | $1.87 \times 10^{-15}$ |
| <i>HLA-DRB1*08:03</i> | 32552080 | 0.0840            | 0.2857  | 3.68 (2.30-5.90)   | $1.33 \times 10^{-7}$  | 0.0868                                 | 0.2976  | 3.93 (2.42-6.38)   | $3.26 \times 10^{-8}$  |

MAF, minor allele frequency; OR, odds ratio.

<sup>a</sup>SNP2HLA<sup>2-4</sup>

**Supplementary Table 4 Association results of 24 SNPs in the combined association study of 42 TiA cases and 927 GD controls**

| dbSNP_ID    | Chr. | Position <sup>a</sup> | Allele <sup>b</sup> | MAF     |                | Additive           |          | Allelic           |          | Trend    |
|-------------|------|-----------------------|---------------------|---------|----------------|--------------------|----------|-------------------|----------|----------|
|             |      |                       |                     | TiA (%) | GD control (%) | OR (95% CI)        | P        | OR (95% CI)       | P        | P        |
| rs56343172  | 3    | 111587245             | T/C                 | 14.3    | 3.1            | 5.47 (2.71-11.05)  | 2.12E-06 | 5.15 (2.65-10.01) | 8.72E-08 | 7.75E-08 |
| rs2530710   | 6    | 30940387              | T/C                 | 38.1    | 11.6           | 5.11 (3.08-8.49)   | 2.94E-10 | 4.70 (2.96-7.46)  | 1.00E-12 | 8.55E-13 |
| rs115194949 | 6    | 30993440              | A/G                 | 35.7    | 10.1           | 5.18 (3.11-8.63)   | 2.56E-10 | 4.92 (3.07-7.87)  | 4.00E-13 | 4.90E-13 |
| rs7768644   | 6    | 31002101              | A/G                 | 33.3    | 9.1            | 5.78 (3.35-9.95)   | 2.66E-10 | 5.01 (3.10-8.10)  | 5.86E-13 | 3.24E-13 |
| rs2517549   | 6    | 31008598              | A/C                 | 29.8    | 8.7            | 5.00 (2.89-8.64)   | 8.39E-09 | 4.45 (2.71-7.30)  | 1.47E-10 | 8.94E-11 |
| rs9262631   | 6    | 31024601              | A/C                 | 32.1    | 6.3            | 8.39 (4.70-14.98)  | 6.79E-13 | 7.09 (4.32-11.63) | 7.34E-19 | 6.19E-19 |
| rs2517515   | 6    | 31029258              | T/C                 | 48.8    | 27.1           | 2.90 (1.84-4.56)   | 4.12E-06 | 2.83 (1.82-4.39)  | 1.52E-06 | 1.38E-06 |
| rs2517506   | 6    | 31031680              | C/T                 | 48.8    | 27.1           | 2.89 (1.84-4.55)   | 4.29E-06 | 2.82 (1.81-4.73)  | 1.63E-06 | 1.45E-06 |
| rs9263475   | 6    | 31050348              | G/A                 | 48.8    | 23.5           | 3.06 (1.96-4.78)   | 9.28E-07 | 3.10 (1.99-4.81)  | 1.47E-07 | 2.04E-07 |
| rs2517485   | 6    | 31074101              | T/C                 | 44.1    | 13.7           | 4.24 (2.73-6.58)   | 1.41E-10 | 4.95 (3.15-7.76)  | 2.93E-14 | 4.91E-13 |
| rs1265062   | 6    | 31078005              | T/C                 | 34.5    | 8.8            | 5.33 (3.22-8.82)   | 7.13E-11 | 5.47 (3.39-8.82)  | 1.15E-14 | 3.74E-14 |
| rs9263688   | 6    | 31091967              | G/A                 | 31.0    | 5.3            | 9.62 (5.29-17.48)  | 1.14E-13 | 8.06 (4.86-13.37) | 4.69E-21 | 4.96E-21 |
| rs9263707   | 6    | 31095246              | T/C                 | 31.0    | 5.3            | 8.91 (4.98-15.96)  | 1.91E-13 | 8.02 (4.84-13.30) | 5.73E-21 | 1.25E-20 |
| rs34531986  | 6    | 31315587              | T/G                 | 36.6    | 8.2            | 8.51 (4.72-15.32)  | 9.70E-13 | 6.48 (4.02-10.47) | 5.79E-18 | 1.78E-18 |
| rs140833037 | 6    | 31325056              | T/C                 | 33.3    | 6.3            | 9.70 (5.32-17.69)  | 1.24E-13 | 7.42 (4.54-12.13) | 3.35E-20 | 1.32E-20 |
| rs17193122  | 6    | 31335336              | A/G                 | 32.1    | 4.7            | 17.32 (8.87-33.80) | 6.34E-17 | 9.59 (5.78-15.9)  | 1.69E-25 | 4.29E-27 |
| rs2596449   | 6    | 31438390              | A/G                 | 23.8    | 4.7            | 6.14 (3.45-10.94)  | 7.24E-10 | 6.35 (3.68-10.96) | 6.22E-14 | 1.90E-13 |
| rs2844505   | 6    | 31439063              | C/T                 | 23.8    | 4.7            | 6.13 (3.44-10.93)  | 7.39E-10 | 6.34 (3.67-10.95) | 6.50E-14 | 1.98E-13 |
| rs805267    | 6    | 31639757              | A/G                 | 27.4    | 10.4           | 3.62 (2.10-6.24)   | 3.79E-06 | 3.26 (1.98-5.39)  | 1.18E-06 | 6.96E-07 |
| rs17201248  | 6    | 31803130              | T/C                 | 26.2    | 9.2            | 3.71 (2.16-6.39)   | 2.22E-06 | 3.48 (2.09-5.81)  | 4.01E-07 | 3.11E-07 |
| rs116869525 | 6    | 32389143              | T/C                 | 27.4    | 8.3            | 3.66 (2.24-6.00)   | 2.49E-07 | 4.16 (2.50-6.90)  | 3.03E-09 | 1.27E-08 |
| rs117921525 | 6    | 32672734              | A/C                 | 31.0    | 12.3           | 3.03 (1.88-4.89)   | 5.55E-06 | 3.20 (1.98-5.19)  | 7.03E-07 | 1.28E-06 |
| rs117968912 | 6    | 32681179              | T/G                 | 35.7    | 13.2           | 3.34 (2.11-5.27)   | 2.47E-07 | 3.65 (2.29-5.82)  | 7.47E-09 | 2.37E-08 |
| rs2228391   | 6    | 32797773              | C/T                 | 28.6    | 10.8           | 3.52 (2.08-5.95)   | 2.57E-06 | 3.32 (2.02-5.46)  | 5.57E-07 | 4.35E-07 |

Chr., chromosome; MAF, minor allele frequency; OR, odds ratio; CI, confidence interval.

<sup>a</sup>Position according to the 19<sup>th</sup> version of the human reference genome from the Genome Reference Consortium (hg19). <sup>b</sup>The first allele indicates the risk allele, and the reference allele is listed in second position.

**Supplementary Table 5 HLA alleles selected by the stepwise logistic regression analysis**

| <b>SNP</b>            | <b>OR (95% CI)</b> | <b>Z-value</b> | <b>Stepwise regression:<br/>P value in final model</b> |
|-----------------------|--------------------|----------------|--------------------------------------------------------|
| <i>HLA-B*38:02</i>    | 13.99 (7.46-26.22) | 8.23           | $1.89 \times 10^{-16}$                                 |
| <i>HLA-DRB1*08:03</i> | 3.62 (2.12-6.16)   | 4.73           | $2.24 \times 10^{-6}$                                  |

OR, odds ratio; CI, confidence interval.

**Supplementary Table 6 Baseline case characteristics between the two HLA genotype groups**

| Characteristics                            | In 42 TiA cases                                |                     |                        |                                              | <i>P</i> |
|--------------------------------------------|------------------------------------------------|---------------------|------------------------|----------------------------------------------|----------|
|                                            | Without <i>B*38:02</i> or<br><i>DRB1*08:03</i> | <i>B*38:02</i> only | <i>DRB1*08:03</i> only | Both <i>B*38:02</i> and<br><i>DRB1*08:03</i> |          |
|                                            | (n = 11)                                       | (n = 9)             | (n = 6)                | (n = 16)                                     |          |
| Female sex – no (%) <sup>a</sup>           | 10 (90.91)                                     | 7 (77.78)           | 5 (83.33)              | 15 (93.75)                                   | 0.623    |
| Age – year <sup>b</sup>                    | 53 (29-77)                                     | 53 (25-66)          | 34 (21-51)             | 50 (25-66)                                   | 0.131    |
| Age at agranulocytosis – year <sup>b</sup> | 41 (18-67)                                     | 42 (22-57)          | 28 (20-33)             | 40 (17-50)                                   | 0.026    |
| Onset of neutropenia – day <sup>b</sup>    | 30 (3-180)                                     | 43.5 (28-66)        | 30 (12-60)             | 34 (12-60)                                   | 0.643    |

<sup>a</sup>*P* value was calculated using Fisher's exact test. <sup>b</sup>Values were presented as: median (range). *P* values for continuous variables were calculated using the Kruskal-Wallis Test.

**Supplementary Table 7 Relationship between HLA genotypes and time from starting the drug to development of neutropenia**

| <b>Characteristics</b>                     | <b><i>HLA-B*38:02</i></b> |                         |          | <b><i>HLA-DRB1*08:03</i></b> |                         |          | <b>Both <i>B*38:02</i> and <i>DRB1*08:03</i></b> |                         |          |
|--------------------------------------------|---------------------------|-------------------------|----------|------------------------------|-------------------------|----------|--------------------------------------------------|-------------------------|----------|
|                                            | Carrier<br>(n = 22)       | Non-carrier<br>(n = 15) | <i>P</i> | Carrier<br>(n = 19)          | Non-carrier<br>(n = 18) | <i>P</i> | Carrier<br>(n = 14)                              | Non-carrier<br>(n = 23) | <i>P</i> |
| Onset of neutropenia -<br>day <sup>a</sup> | 39 (12-66)                | 30 (3-180)              | 0.527    | 30 (12-60)                   | 30 (3-180)              | 0.496    | 34 (12-60)                                       | 30 (3-180)              | 0.684    |

<sup>a</sup>Values were presented as: median (range).

**Supplementary Table 8 Associations between HLA genotypes and medications**

| HLA type              | Study group<br>(no. of samples)    | Genotype Frequency<br>Number (percent) |                                    |                                  | (Homozygous+Heterozygous)<br>odds ratio (PP <sup>a</sup> +PA <sup>a</sup> vs. AA <sup>a</sup> ) |                             | Allelic odds ratio<br>(P <sup>a</sup> vs. A <sup>a</sup> ) |                             |
|-----------------------|------------------------------------|----------------------------------------|------------------------------------|----------------------------------|-------------------------------------------------------------------------------------------------|-----------------------------|------------------------------------------------------------|-----------------------------|
|                       |                                    | Homozygous<br>(PP <sup>a</sup> )       | Heterozygous<br>(PA <sup>a</sup> ) | Noncarrier<br>(AA <sup>a</sup> ) | OR (95% CI)                                                                                     | <i>P</i> value <sup>b</sup> | OR (95% CI)                                                | <i>P</i> value <sup>b</sup> |
| <b>HLA-B*38:02</b>    | <b>TiA (42)</b>                    | 0 (0)                                  | 25 (59.52)                         | 17 (40.48)                       | 21.49 (11.13-41.49)                                                                             | 3.14E-18                    | 12.31 (7.33-20.67)                                         | 2.28E-32                    |
|                       | Carbimazole (9)                    | 0 (0)                                  | 3 (33.33)                          | 6 (66.67)                        | 7.31 (1.79-29.77)                                                                               | 1.75E-2                     | 5.81 (1.65-20.47)                                          | 1.90E-3                     |
|                       | Methimazole (23)                   | 0 (0)                                  | 18 (78.26)                         | 5 (21.74)                        | 52.60 (19.02-145.48)                                                                            | 5.15E-17                    | 18.68 (9.92-35.16)                                         | 1.24E-34                    |
|                       | Propylthiouracil (9)               | 0 (0)                                  | 3 (33.33)                          | 6 (66.67)                        | 7.31 (1.79-29.77)                                                                               | 1.75E-2                     | 5.81 (1.65-20.47)                                          | 1.90E-3                     |
|                       | <b>Controls<sup>c</sup> (1208)</b> | 3 (0.25)                               | 74 (6.16)                          | 1125 (93.59)                     | 1.00                                                                                            |                             | 1.00                                                       |                             |
| <b>HLA-DRB1*08:03</b> | <b>TiA (42)</b>                    | 2 (4.76)                               | 20 (47.62)                         | 20 (47.62)                       | 6.13 (3.28-11.46)                                                                               | 5.08E-8                     | 4.36 (2.66-7.15)                                           | 2.60E-10                    |
|                       | Carbimazole (9)                    | 0 (0)                                  | 5 (55.56)                          | 4 (44.44)                        | 6.96 (1.85-26.18)                                                                               | 6.30E-3                     | 4.19 (1.48-11.88)                                          | 3.40E-3                     |
|                       | Methimazole (23)                   | 2 (8.70)                               | 12 (52.17)                         | 9 (39.13)                        | 8.67 (3.70-20.32)                                                                               | 1.08E-6                     | 5.81 (3.12-10.85)                                          | 4.86E-10                    |
|                       | Propylthiouracil (9)               | 0 (0)                                  | 2 (22.22)                          | 7 (77.78)                        | 1.59 (0.33-7.72)                                                                                | 6.34E-1                     | 1.36 (0.31-5.97)                                           | 6.80E-1                     |
|                       | <b>Controls<sup>c</sup> (1208)</b> | 19 (1.59)                              | 163 (13.63)                        | 1014 (84.78)                     | 1.00                                                                                            |                             | 1.00                                                       |                             |

<sup>a</sup>P, present; A, absent. <sup>b</sup>*P* values were derived from comparison with overall distribution in GD controls. <sup>c</sup>According to the Taiwan National Health Insurance Research Database (NHIRD), the proportions of GD patients prescribed with carbimazole, methimazole and propylthiouracil were 0.2, 0.485 and 0.315, respectively (unpublished data), which were not statistically different (*P* = 0.40) from those for the TiA patients (0.22, 0.56, and 0.22).

**Supplementary Table 9 Results of association analysis using Cochran-Armitage trend test with 1:10 age- and gender-matched cases and controls in the combined samples**

| SNPs        | Chr. | Allele 1 | Allele 2 | Combined samples   |                                           |
|-------------|------|----------|----------|--------------------|-------------------------------------------|
|             |      |          |          | Original           | 1:10 matched for age and gender           |
|             |      |          |          | $P_{\text{trend}}$ | Median <sup>a</sup> of $P_{\text{trend}}$ |
| rs56343172  | 3    | T        | C        | 7.75E-08           | 1.67E-06                                  |
| rs2530710   | 6    | T        | C        | 8.55E-13           | 2.17E-11                                  |
| rs115194949 | 6    | A        | G        | 4.90E-13           | 1.31E-11                                  |
| rs7768644   | 6    | A        | G        | 3.24E-13           | 5.76E-12                                  |
| rs2517549   | 6    | A        | C        | 8.94E-11           | 7.18E-10                                  |
| rs9262631   | 6    | A        | C        | 6.19E-19           | 2.54E-16                                  |
| rs2517515   | 6    | T        | C        | 1.38E-06           | 2.70E-06                                  |
| rs2517506   | 6    | C        | T        | 1.45E-06           | 2.88E-06                                  |
| rs9263475   | 6    | G        | A        | 2.04E-07           | 5.23E-07                                  |
| rs2517485   | 6    | T        | C        | 4.91E-13           | 1.19E-11                                  |
| rs1265062   | 6    | T        | C        | 3.74E-14           | 7.25E-13                                  |
| rs9263688   | 6    | G        | A        | 4.96E-21           | 8.73E-18                                  |
| rs9263707   | 6    | T        | C        | 1.25E-20           | 1.07E-17                                  |
| rs34531986  | 6    | T        | G        | 1.78E-18           | 9.27E-16                                  |
| rs140833037 | 6    | T        | C        | 1.32E-20           | 2.10E-17                                  |
| rs17193122  | 6    | A        | G        | 4.29E-27           | 3.51E-22                                  |
| rs2596449   | 6    | A        | G        | 1.90E-13           | 9.96E-11                                  |
| rs2844505   | 6    | C        | T        | 1.98E-13           | 9.96E-11                                  |
| rs805267    | 6    | A        | G        | 6.96E-07           | 2.37E-06                                  |
| rs17201248  | 6    | T        | C        | 3.11E-07           | 1.73E-06                                  |
| rs116869525 | 6    | T        | C        | 1.27E-08           | 2.37E-07                                  |
| rs117921525 | 6    | A        | C        | 1.28E-06           | 1.08E-05                                  |
| rs117968912 | 6    | T        | G        | 2.37E-08           | 3.96E-07                                  |
| rs2228391   | 6    | C        | T        | 4.35E-07           | 3.34E-06                                  |

Chr., chromosome.  
<sup>a</sup>1,000 bootstraps.



**Supplementary Table 10 Results of association analysis using Cochran-Armitage trend test adjusting for potential population substructure by the first two and the first 10 dimensions from multidimensional scaling (MDS) analysis in the combined samples.**

| SNPs        | Chr. | Allele | Allele | Combined samples   |                               |                               |
|-------------|------|--------|--------|--------------------|-------------------------------|-------------------------------|
|             |      |        |        | Original           | Adjusted                      |                               |
|             |      |        |        | $P_{\text{trend}}$ | $P^{\text{a}}_{\text{trend}}$ | $P^{\text{b}}_{\text{trend}}$ |
| rs56343172  | 3    | T      | C      | 7.75E-08           | 1.15E-06                      | 5.61E-07                      |
| rs2530710   | 6    | T      | C      | 8.55E-13           | 6.90E-10                      | 8.20E-10                      |
| rs115194949 | 6    | A      | G      | 4.90E-13           | 5.84E-10                      | 6.41E-10                      |
| rs7768644   | 6    | A      | G      | 3.24E-13           | 5.03E-10                      | 3.39E-10                      |
| rs2517549   | 6    | A      | C      | 8.94E-11           | 1.54E-08                      | 7.40E-09                      |
| rs9262631   | 6    | A      | C      | 6.19E-19           | 1.57E-12                      | 3.56E-13                      |
| rs2517515   | 6    | T      | C      | 1.38E-06           | 4.86E-06                      | 1.71E-06                      |
| rs2517506   | 6    | C      | T      | 1.45E-06           | 4.99E-06                      | 1.76E-06                      |
| rs9263475   | 6    | G      | A      | 2.04E-07           | 1.22E-06                      | 2.58E-07                      |
| rs2517485   | 6    | T      | C      | 4.91E-13           | 2.70E-10                      | 1.58E-11                      |
| rs1265062   | 6    | T      | C      | 3.74E-14           | 1.36E-10                      | 3.33E-11                      |
| rs9263688   | 6    | G      | A      | 4.96E-21           | 4.18E-13                      | 1.39E-13                      |
| rs9263707   | 6    | T      | C      | 1.25E-20           | 5.47E-13                      | 2.06E-13                      |
| rs34531986  | 6    | T      | G      | 1.78E-18           | 7.95E-13                      | 3.68E-13                      |
| rs140833037 | 6    | T      | C      | 1.32E-20           | 6.38E-14                      | 3.25E-14                      |
| rs17193122  | 6    | A      | G      | 4.29E-27           | 1.23E-16                      | 1.47E-16                      |
| rs2596449   | 6    | A      | G      | 1.90E-13           | 5.00E-10                      | 8.28E-10                      |
| rs2844505   | 6    | C      | T      | 1.98E-13           | 5.09E-10                      | 8.42E-10                      |
| rs805267    | 6    | A      | G      | 6.96E-07           | 2.80E-06                      | 3.35E-06                      |
| rs17201248  | 6    | T      | C      | 3.11E-07           | 1.01E-06                      | 1.87E-06                      |
| rs116869525 | 6    | T      | C      | 1.27E-08           | 5.60E-07                      | 9.28E-07                      |
| rs117921525 | 6    | A      | C      | 1.28E-06           | 1.09E-05                      | 2.15E-05                      |
| rs117968912 | 6    | T      | G      | 2.37E-08           | 5.99E-07                      | 1.45E-06                      |
| rs2228391   | 6    | C      | T      | 4.35E-07           | 2.39E-06                      | 2.93E-06                      |

Chr., chromosome.

<sup>a</sup>Adjusted for the first two dimensions. <sup>b</sup>Adjusted for the first 10 dimensions.

**Supplementary Table 11 Results of association analysis using Cochran-Armitage trend test adjusting for the first two and the first 10 principal components identified by GCTA in the combined samples**

| SNPs        | Chr. | A1 | A2 | Combined samples |               |               |
|-------------|------|----|----|------------------|---------------|---------------|
|             |      |    |    | Original         | Adjusted      |               |
|             |      |    |    | $P_{trend}$      | $P^a_{trend}$ | $P^b_{trend}$ |
| rs56343172  | 3    | T  | C  | 7.75E-08         | 1.15E-06      | 4.97E-07      |
| rs2530710   | 6    | T  | C  | 8.55E-13         | 6.20E-10      | 6.35E-10      |
| rs115194949 | 6    | A  | G  | 4.90E-13         | 5.08E-10      | 4.24E-10      |
| rs7768644   | 6    | A  | G  | 3.24E-13         | 4.51E-10      | 2.81E-10      |
| rs2517549   | 6    | A  | C  | 8.94E-11         | 1.46E-08      | 8.44E-09      |
| rs9262631   | 6    | A  | C  | 6.19E-19         | 1.72E-12      | 5.52E-13      |
| rs2517515   | 6    | T  | C  | 1.38E-06         | 5.11E-06      | 2.15E-06      |
| rs2517506   | 6    | C  | T  | 1.45E-06         | 5.27E-06      | 2.22E-06      |
| rs9263475   | 6    | G  | A  | 2.04E-07         | 1.34E-06      | 3.79E-07      |
| rs2517485   | 6    | T  | C  | 4.91E-13         | 2.93E-10      | 3.13E-11      |
| rs1265062   | 6    | T  | C  | 3.74E-14         | 1.38E-10      | 6.47E-11      |
| rs9263688   | 6    | G  | A  | 4.96E-21         | 3.67E-13      | 2.11E-13      |
| rs9263707   | 6    | T  | C  | 1.25E-20         | 5.54E-13      | 3.65E-13      |
| rs34531986  | 6    | T  | G  | 1.78E-18         | 8.15E-13      | 5.72E-13      |
| rs140833037 | 6    | T  | C  | 1.32E-20         | 5.92E-14      | 4.96E-14      |
| rs17193122  | 6    | A  | G  | 4.29E-27         | 1.06E-16      | 1.55E-16      |
| rs2596449   | 6    | A  | G  | 1.90E-13         | 4.82E-10      | 9.50E-10      |
| rs2844505   | 6    | C  | T  | 1.98E-13         | 4.90E-10      | 9.70E-10      |
| rs805267    | 6    | A  | G  | 6.96E-07         | 2.61E-06      | 3.57E-06      |
| rs17201248  | 6    | T  | C  | 3.11E-07         | 1.06E-06      | 1.72E-06      |
| rs116869525 | 6    | T  | C  | 1.27E-08         | 4.26E-07      | 1.02E-06      |
| rs117921525 | 6    | A  | C  | 1.28E-06         | 8.84E-06      | 2.07E-05      |
| rs117968912 | 6    | T  | G  | 2.37E-08         | 4.63E-07      | 1.36E-06      |
| rs2228391   | 6    | C  | T  | 4.35E-07         | 2.30E-06      | 3.94E-06      |

GCTA, genome-wide complex trait analysis (Yang *et al.*<sup>5</sup>); Chr., chromosome.

<sup>a</sup>Adjusted for the first 2 principal components. <sup>b</sup>Adjusted for the first 10 principal components.

## Supplementary references

1. Gauderman, W.J. Sample size requirements for association studies of gene-gene interaction. *Am. J. Epidemiol.* **155**, 478-484 (2002).
2. Okada, Y. *et al.* Risk for ACPA-positive rheumatoid arthritis is driven by shared HLA amino acid polymorphisms in Asian and European populations. *Hum. Mol. Genet.* **23**, 6916-6926 (2014).
3. Jia, X. *et al.* Imputing amino acid polymorphisms in human leukocyte antigens. *PLoS One* **8**, e64683 (2013).
4. Pillai, N.E. *et al.* Predicting HLA alleles from high-resolution SNP data in three Southeast Asian populations. *Hum. Mol. Genet.* **23**, 4443-4451 (2014).
5. Yang, J., Lee, S.H., Goddard, M.E. & Visscher, P.M. GCTA: a tool for genome-wide complex trait analysis. *Am. J. Hum. Genet.* **88**, 76-82 (2011).
